# Supplementary material
Source: PubMed Central journal article supplement (PMC2234191)
Supplement: pnas_0707772105_1.pdf [file pnas_0707772105_1.pdf]

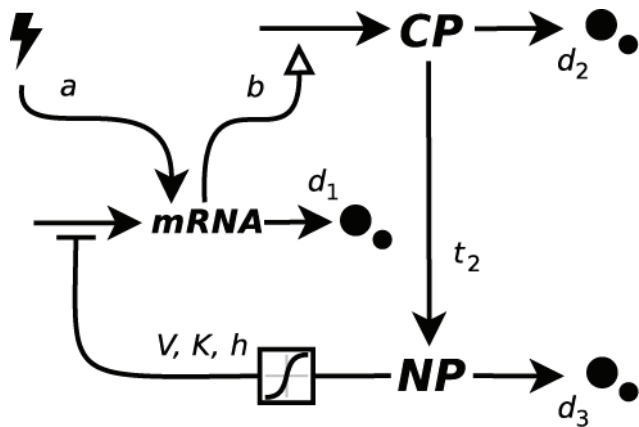

$$f \cdot \frac{dmRNA}{dt} = V / \left( 1 + (CP/K)^h \right) - d_1 \cdot mRNA + f \cdot a \cdot p(t)$$

$$f \cdot \frac{dCP}{dt} = b \cdot mRNA - (d_2 + t_2) \cdot CP$$

$$f \cdot \frac{dNP}{dt} = t_2 \cdot CP - d_3 \cdot NP$$
