# Supplementary material
Source: PubMed Central journal article supplement (PMC2234191)

## LOWER TRANSCRIPTIONAL AMPLITUDE, MORNING TYPE

### WEAKER PHASE SHIFT

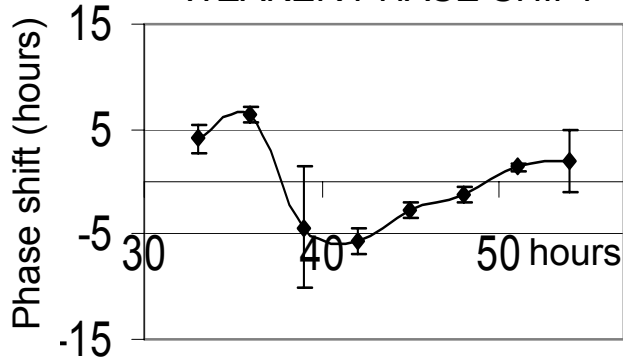

### STRONGER PHASE SHIFT

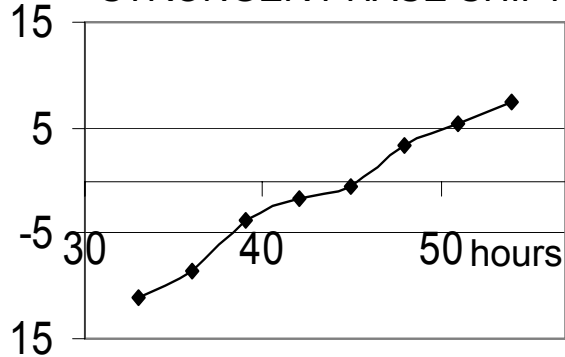

## HIGHER TRANSCRIPTIONAL AMPLITUDE, EVENING TYPE

### WEAKER PHASE SHIFT

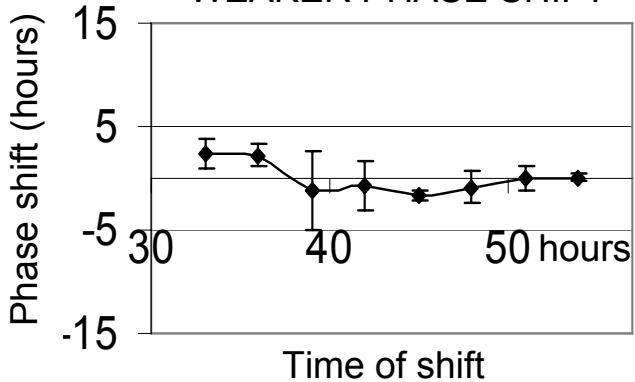

### STRONGER PHASE SHIFT

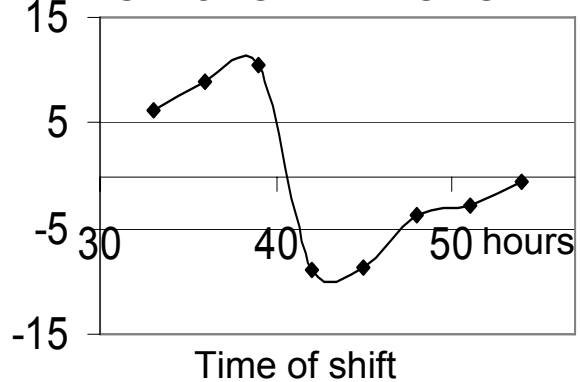

Supplement: pnas_0707772105_3.pdf [file pnas_0707772105_3.pdf]
