# Supplementary material
Source: PubMed Central journal article supplement (PMC2234191)

PERIOD

Long Short

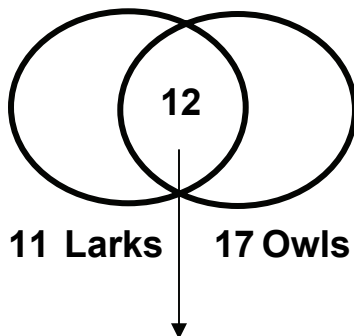

Rev Erb $\alpha$  AMPLITUDE

Low High

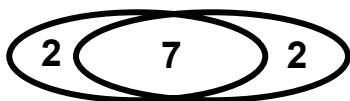

Larks Owls

PHASE RESPONSE

High Low

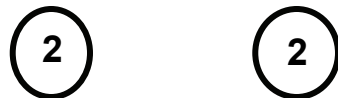

Larks Owls

High Low

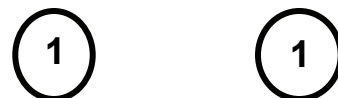

Larks Owls

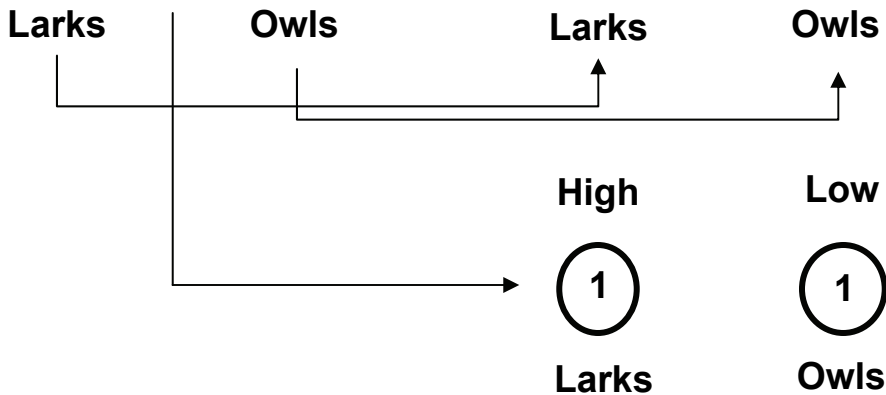

Supplement: pnas_0707772105_4.pdf [file pnas_0707772105_4.pdf]
