# Supplementary material
Source: PubMed Central journal article supplement (PMC2234191)

(2)

(4)

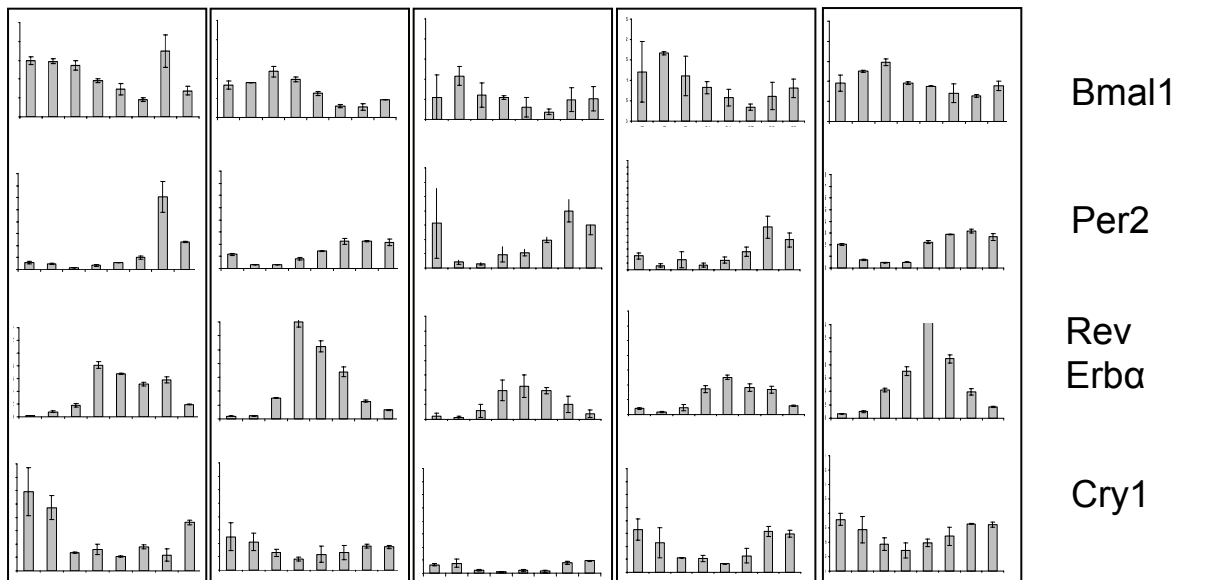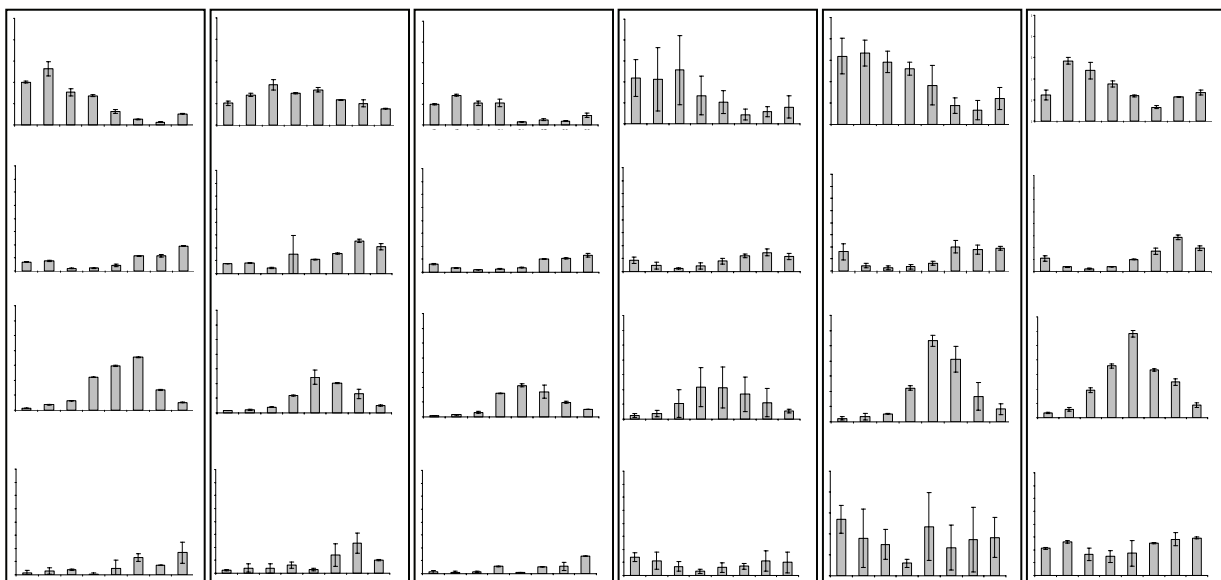

(1)

(3)

12 15 18 21 24 27 30 33 hours

Supplement: pnas_0707772105_2.pdf [file pnas_0707772105_2.pdf]

**A**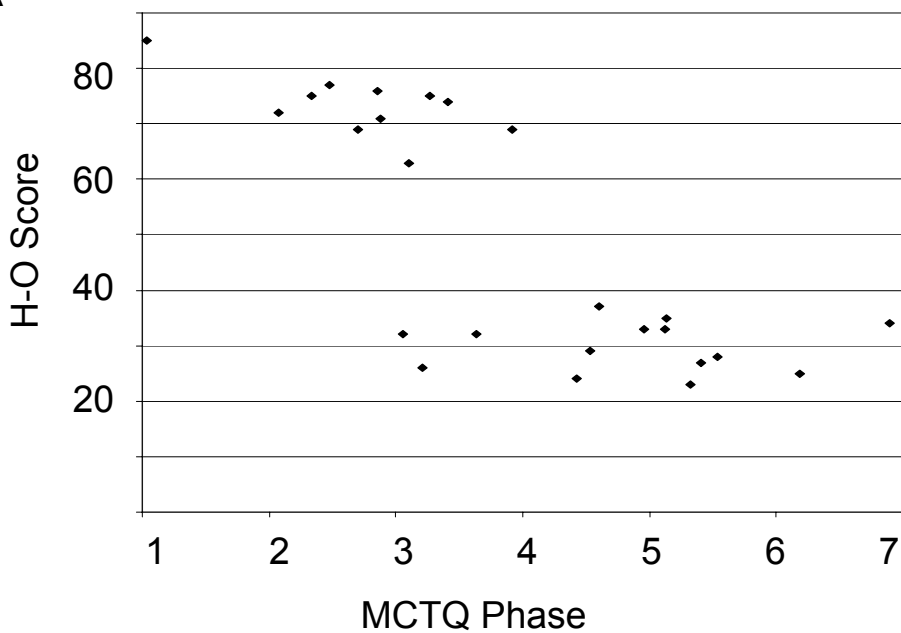**B**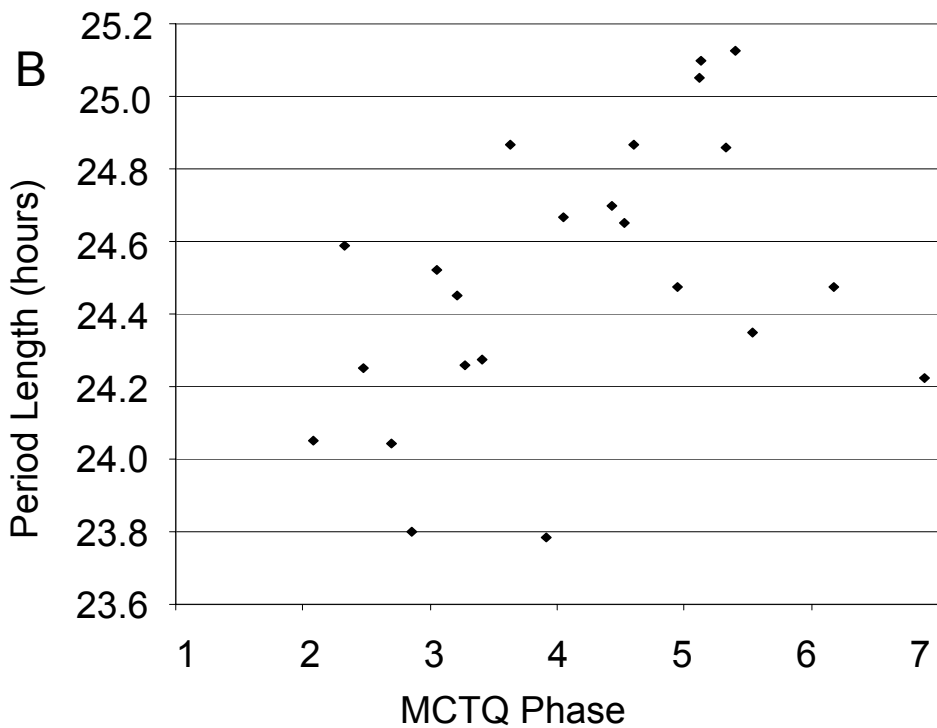

Supplement: pnas_0707772105_5.pdf [file pnas_0707772105_5.pdf]
